# Supplementary material for: An Autophagy-Related Gene-Based Prognostic Risk Signature for Hepatocellular Carcinoma: Construction and Validation
Source: Comput Math Methods Med. 2021 Oct 13;2021:5770228. doi: 10.1155/2021/5770228 (PMC8529386; doi:10.1155/2021/5770228)
Supplement: Supplementary 1 — Supplementary Table 1: clinical information in TCGA-LIHC dataset. [file 5770228.f1.txt]

id	futime	fustat	age	gender	M	N	stage	T
TCGA-DD-AACK	9	0	70	male	M0	N0	Stage I	T1
TCGA-DD-A73E	44	0	66	male	M0	N0	Stage I	T1
TCGA-DD-AAD0	137	0	73	female	M0	N0	Stage I	T1
TCGA-DD-AAE6	141	0	59	female	M0	N0	Stage I	T1
TCGA-G3-A3CI	180	0	71	male	M0	N0	Stage I	T1
TCGA-DD-A1EI	183	0	46	male	M0	N0	Stage I	T1
TCGA-MI-A75C	291	0	64	male	M0	N0	Stage I	T1
TCGA-5C-A9VH	322	0	70	male	M0	N0	Stage I	T1
TCGA-DD-AAC9	347	0	51	male	M0	N0	Stage I	T1
TCGA-G3-AAV2	372	0	50	male	M0	N0	Stage I	T1
TCGA-BC-A69I	387	0	69	male	M0	N0	Stage I	T1
TCGA-BD-A3EP	409	0	75	female	M0	N0	Stage I	T1
TCGA-DD-AACP	415	0	64	male	M0	N0	Stage I	T1
TCGA-DD-AADO	453	0	55	male	M0	N0	Stage I	T1
TCGA-DD-AADP	458	0	45	male	M0	N0	Stage I	T1
TCGA-RC-A7SK	472	0	59	male	M0	N0	Stage I	T1
TCGA-DD-AADS	474	0	63	male	M0	N0	Stage I	T1
TCGA-G3-AAV0	476	0	58	male	M0	N0	Stage I	T1
TCGA-DD-AAEB	478	0	60	male	M0	N0	Stage I	T1
TCGA-G3-AAUZ	480	0	48	male	M0	N0	Stage I	T1
TCGA-DD-AAE1	552	0	52	male	M0	N0	Stage I	T1
TCGA-DD-AADY	555	0	55	female	M0	N0	Stage I	T1
TCGA-DD-AAD1	564	0	51	female	M0	N0	Stage I	T1
TCGA-DD-AAE3	566	0	50	male	M0	N0	Stage I	T1
TCGA-DD-AADV	574	0	50	male	M0	N0	Stage I	T1
TCGA-DD-AAEA	575	0	65	male	M0	N0	Stage I	T1
TCGA-RC-A7SF	579	0	66	male	M0	N0	Stage I	T1
TCGA-G3-A3CK	585	0	61	male	M0	N0	Stage I	T1
TCGA-DD-AADW	587	0	48	male	M0	N0	Stage I	T1
TCGA-DD-A1EC	602	0	20	female	M0	N0	Stage I	T1
TCGA-DD-AAE4	608	0	49	female	M0	N0	Stage I	T1
TCGA-DD-AADL	636	0	58	male	M0	N0	Stage I	T1
TCGA-DD-AAE2	638	0	51	male	M0	N0	Stage I	T1
TCGA-RC-A7S9	640	0	47	female	M0	N0	Stage I	T1
TCGA-DD-AAE7	644	0	72	male	M0	N0	Stage I	T1
TCGA-G3-A25Z	655	0	58	male	M0	N0	Stage I	T1
TCGA-DD-AAD2	658	0	66	male	M0	N0	Stage I	T1
TCGA-DD-A11C	662	0	69	male	M0	N0	Stage I	T1
TCGA-DD-AAE8	664	0	45	male	M0	N0	Stage I	T1
TCGA-G3-A3CG	673	0	80	male	M0	N0	Stage I	T1
TCGA-DD-AAEG	719	0	59	female	M0	N0	Stage I	T1
TCGA-DD-AAE9	722	0	69	male	M0	N0	Stage I	T1
TCGA-DD-A73A	728	0	71	male	M0	N0	Stage I	T1
TCGA-DD-AAED	763	0	51	male	M0	N0	Stage I	T1
TCGA-DD-AAEH	784	0	73	male	M0	N0	Stage I	T1
TCGA-DD-AAEE	810	0	55	male	M0	N0	Stage I	T1
TCGA-KR-A7K2	829	0	64	male	M0	N0	Stage I	T1
TCGA-G3-A25V	860	0	68	male	M0	N0	Stage I	T1
TCGA-KR-A7K8	906	0	57	male	M0	N0	Stage I	T1
TCGA-DD-A4NF	942	0	72	male	M0	N0	Stage I	T1
TCGA-DD-A4NB	989	0	25	male	M0	N0	Stage I	T1
TCGA-DD-AADJ	1066	0	70	female	M0	N0	Stage I	T1
TCGA-DD-A73F	1085	0	77	female	M0	N0	Stage I	T1
TCGA-DD-AADI	1085	0	43	female	M0	N0	Stage I	T1
TCGA-DD-AADE	1202	0	50	male	M0	N0	Stage I	T1
TCGA-DD-AAD8	1219	0	73	female	M0	N0	Stage I	T1
TCGA-DD-AADD	1231	0	51	male	M0	N0	Stage I	T1
TCGA-DD-AADA	1233	0	66	female	M0	N0	Stage I	T1
TCGA-DD-AADB	1242	0	51	male	M0	N0	Stage I	T1
TCGA-DD-AAD3	1295	0	43	male	M0	N0	Stage I	T1
TCGA-DD-AACN	1302	0	32	male	M0	N0	Stage I	T1
TCGA-DD-AAD5	1345	0	54	male	M0	N0	Stage I	T1
TCGA-DD-AACW	1424	0	43	male	M0	N0	Stage I	T1
TCGA-DD-AACY	1450	0	61	male	M0	N0	Stage I	T1
TCGA-DD-AAEI	1531	0	72	male	M0	N0	Stage I	T1
TCGA-DD-AACV	1531	0	53	male	M0	N0	Stage I	T1
TCGA-DD-AACT	1562	0	69	female	M0	N0	Stage I	T1
TCGA-DD-AACU	1567	0	59	male	M0	N0	Stage I	T1
TCGA-DD-AAW3	1633	0	69	male	M0	N0	Stage I	T1
TCGA-G3-A25U	1636	0	63	female	M0	N0	Stage I	T1
TCGA-DD-A4NL	1711	0	46	male	M0	N0	Stage I	T1
TCGA-DD-AACS	1804	0	39	male	M0	N0	Stage I	T1
TCGA-DD-AAVS	1823	0	56	male	M0	N0	Stage I	T1
TCGA-DD-AAW2	1855	0	69	male	M0	N0	Stage I	T1
TCGA-DD-AACO	1876	0	40	male	M0	N0	Stage I	T1
TCGA-DD-AAVZ	1900	0	38	male	M0	N0	Stage I	T1
TCGA-DD-AAW0	2015	0	54	male	M0	N0	Stage I	T1
TCGA-DD-A1EB	2017	0	72	female	M0	N0	Stage I	T1
TCGA-DD-AADR	2028	0	58	male	M0	N0	Stage I	T1
TCGA-DD-AACE	2184	0	62	male	M0	N0	Stage I	T1
TCGA-DD-A4NO	2245	0	65	male	M0	N0	Stage I	T1
TCGA-DD-A1ED	2301	0	68	male	M0	N0	Stage I	T1
TCGA-DD-AACA	2301	0	65	male	M0	N0	Stage I	T1
TCGA-DD-AAVW	2317	0	35	male	M0	N0	Stage I	T1
TCGA-DD-AACB	2324	0	74	female	M0	N0	Stage I	T1
TCGA-DD-AAVR	2513	0	44	male	M0	N0	Stage I	T1
TCGA-DD-AAVQ	2728	0	38	male	M0	N0	Stage I	T1
TCGA-DD-A4ND	2746	0	56	female	M0	N0	Stage I	T1
TCGA-DD-AAVP	2752	0	48	male	M0	N0	Stage I	T1
TCGA-DD-A4NP	3308	0	32	male	M0	N0	Stage I	T1
TCGA-DD-A73G	3478	0	73	female	M0	N0	Stage I	T1
TCGA-DD-A4NR	9	1	85	female	M0	N0	Stage I	T1
TCGA-DD-A11B	14	1	73	male	M0	N0	Stage I	T1
TCGA-DD-AAC8	16	1	72	male	M0	N0	Stage I	T1
TCGA-G3-AAV4	27	1	83	female	M0	N0	Stage I	T1
TCGA-KR-A7K0	65	1	65	male	M0	N0	Stage I	T1
TCGA-DD-AACL	107	1	66	female	M0	N0	Stage I	T1
TCGA-DD-AADF	115	1	64	female	M0	N0	Stage I	T1
TCGA-DD-AACZ	171	1	63	female	M0	N0	Stage I	T1
TCGA-DD-A73B	283	1	72	female	M0	N0	Stage I	T1
TCGA-DD-AACF	365	1	68	male	M0	N0	Stage I	T1
TCGA-DD-AACD	381	1	48	male	M0	N0	Stage I	T1
TCGA-DD-A1EF	394	1	57	female	M0	N0	Stage I	T1
TCGA-G3-A25S	416	1	64	male	M0	N0	Stage I	T1
TCGA-DD-AADC	425	1	53	male	M0	N0	Stage I	T1
TCGA-G3-A25Y	452	1	52	female	M0	N0	Stage I	T1
TCGA-DD-A3A3	535	1	45	male	M0	N0	Stage I	T1
TCGA-FV-A2QR	581	1	75	male	M0	N0	Stage I	T1
TCGA-DD-A4NN	899	1	56	female	M0	N0	Stage I	T1
TCGA-DD-A1EG	1372	1	76	male	M0	N0	Stage I	T1
TCGA-DD-A11D	1560	1	57	female	M0	N0	Stage I	T1
TCGA-DD-AACC	1685	1	61	male	M0	N0	Stage I	T1
TCGA-DD-A3A2	2131	1	76	female	M0	N0	Stage I	T1
TCGA-DD-A4NS	2456	1	61	female	M0	N0	Stage I	T1
TCGA-DD-A1E9	2759	1	70	male	M0	N0	Stage I	T1
TCGA-MR-A8JO	330	0	34	male	MX	N0	Stage I	T1
TCGA-K7-A6G5	512	0	66	male	MX	N0	Stage I	T1
TCGA-EP-A26S	608	0	70	male	MX	N0	Stage I	T1
TCGA-2Y-A9H9	697	0	70	male	MX	N0	Stage I	T1
TCGA-FV-A2QQ	729	0	80	male	MX	N0	Stage I	T1
TCGA-2Y-A9H7	1168	0	81	female	MX	N0	Stage I	T1
TCGA-2Y-A9H4	1452	0	68	male	MX	N0	Stage I	T1
TCGA-2Y-A9H2	1731	0	64	female	MX	N0	Stage I	T1
TCGA-BC-A10Z	34	1	62	female	MX	N0	Stage I	T1
TCGA-UB-A7MD	52	1	67	male	MX	N0	Stage I	T1
TCGA-GJ-A9DB	67	1	68	male	MX	N0	Stage I	T1
TCGA-DD-AA3A	410	1	81	female	MX	N0	Stage I	T1
TCGA-2Y-A9H5	555	1	59	female	MX	N0	Stage I	T1
TCGA-2Y-A9GW	1271	1	64	male	MX	N0	Stage I	T1
TCGA-BC-A3KF	8	0	66	female	M0	NX	Stage I	T1
TCGA-FV-A496	10	0	84	female	M0	NX	Stage I	T1
TCGA-FV-A4ZQ	12	0	52	male	M0	NX	Stage I	T1
TCGA-ED-A627	423	0	74	male	M0	NX	Stage I	T1
TCGA-LG-A9QC	425	0	48	male	M0	NX	Stage I	T1
TCGA-G3-A5SJ	698	0	59	male	M0	NX	Stage I	T1
TCGA-G3-A5SK	744	0	58	male	M0	NX	Stage I	T1
TCGA-XR-A8TG	898	0	58	male	M0	NX	Stage I	T1
TCGA-HP-A5MZ	91	1	78	male	M0	NX	Stage I	T1
TCGA-DD-A39Y	171	1	67	male	M0	NX	Stage I	T1
TCGA-DD-A3A0	785	1	70	male	M0	NX	Stage I	T1
TCGA-DD-A39X	1694	1	78	female	M0	NX	Stage I	T1
TCGA-MR-A520	229	0	58	male	MX	NX	Stage I	T1
TCGA-2Y-A9HB	260	0	66	male	MX	NX	Stage I	T1
TCGA-EP-A3JL	303	0	76	male	MX	NX	Stage I	T1
TCGA-WJ-A86L	345	0	68	female	MX	NX	Stage I	T1
TCGA-2Y-A9H6	357	0	68	female	MX	NX	Stage I	T1
TCGA-G3-A7M7	361	0	65	male	MX	NX	Stage I	T1
TCGA-G3-A7M8	430	0	31	male	MX	NX	Stage I	T1
TCGA-G3-A7M5	447	0	76	male	MX	NX	Stage I	T1
TCGA-UB-A7ME	486	0	51	male	MX	NX	Stage I	T1
TCGA-K7-A5RG	519	0	66	male	MX	NX	Stage I	T1
TCGA-O8-A75V	538	0	54	male	MX	NX	Stage I	T1
TCGA-EP-A12J	570	0	62	male	MX	NX	Stage I	T1
TCGA-WX-AA44	615	0	64	female	MX	NX	Stage I	T1
TCGA-K7-A5RF	631	0	64	male	MX	NX	Stage I	T1
TCGA-G3-A7M6	632	0	60	female	MX	NX	Stage I	T1
TCGA-NI-A8LF	799	0	74	male	MX	NX	Stage I	T1
TCGA-GJ-A3OU	879	0	59	male	MX	NX	Stage I	T1
TCGA-DD-AADN	898	0	59	male	MX	NX	Stage I	T1
TCGA-XR-A8TC	1339	0	43	female	MX	NX	Stage I	T1
TCGA-2Y-A9GU	1939	0	55	female	MX	NX	Stage I	T1
TCGA-2Y-A9GX	2442	0	68	male	MX	NX	Stage I	T1
TCGA-EP-A2KC	19	1	62	male	MX	NX	Stage I	T1
TCGA-FV-A3R2	194	1	75	male	MX	NX	Stage I	T1
TCGA-FV-A3R3	366	1	38	female	MX	NX	Stage I	T1
TCGA-ES-A2HT	438	1	54	male	MX	NX	Stage I	T1
TCGA-EP-A2KB	596	1	46	female	MX	NX	Stage I	T1
TCGA-ES-A2HS	688	1	80	male	MX	NX	Stage I	T1
TCGA-XR-A8TF	693	1	74	male	MX	NX	Stage I	T1
TCGA-2Y-A9H1	1229	1	58	male	MX	NX	Stage I	T1
TCGA-2Y-A9GT	1624	1	51	male	MX	NX	Stage I	T1
TCGA-2Y-A9GV	2532	1	54	female	MX	NX	Stage I	T1
TCGA-DD-A1EJ	1005	1	71	female	M0	N1	Stage III	T1
TCGA-RC-A6M5	15	0	20	female	M0	N1	Stage IV	T1
TCGA-5C-AAPD	20	0	61	male	M0	N0	Stage II	T2
TCGA-DD-AACX	170	0	66	male	M0	N0	Stage II	T2
TCGA-CC-A9FS	211	0	55	male	M0	N0	Stage II	T2
TCGA-5C-A9VG	328	0	58	male	M0	N0	Stage II	T2
TCGA-G3-AAV5	354	0	67	male	M0	N0	Stage II	T2
TCGA-G3-AAV7	361	0	38	male	M0	N0	Stage II	T2
TCGA-CC-A7IJ	382	0	56	male	M0	N0	Stage II	T2
TCGA-ED-A7XP	400	0	53	female	M0	N0	Stage II	T2
TCGA-G3-AAV3	412	0	58	female	M0	N0	Stage II	T2
TCGA-DD-AADQ	436	0	59	male	M0	N0	Stage II	T2
TCGA-RC-A7SH	468	0	42	male	M0	N0	Stage II	T2
TCGA-5R-AA1C	520	0	57	male	M0	N0	Stage II	T2
TCGA-DD-AADU	554	0	60	male	M0	N0	Stage II	T2
TCGA-RC-A7SB	588	0	53	male	M0	N0	Stage II	T2
TCGA-G3-A3CJ	594	0	52	male	M0	N0	Stage II	T2
TCGA-BC-A3KG	680	0	68	female	M0	N0	Stage II	T2
TCGA-MI-A75G	698	0	63	male	M0	N0	Stage II	T2
TCGA-ED-A4XI	819	0	58	male	M0	N0	Stage II	T2
TCGA-ED-A5KG	854	0	60	female	M0	N0	Stage II	T2
TCGA-ED-A459	910	0	47	male	M0	N0	Stage II	T2
TCGA-DD-A4NJ	928	0	54	female	M0	N0	Stage II	T2
TCGA-KR-A7K7	951	0	61	female	M0	N0	Stage II	T2
TCGA-DD-AADK	1049	0	68	female	M0	N0	Stage II	T2
TCGA-DD-AAEK	1067	0	51	male	M0	N0	Stage II	T2
TCGA-RG-A7D4	1098	0	69	male	M0	N0	Stage II	T2
TCGA-DD-AACI	1618	0	69	male	M0	N0	Stage II	T2
TCGA-DD-AAVX	1718	0	38	male	M0	N0	Stage II	T2
TCGA-DD-AACM	1769	0	48	male	M0	N0	Stage II	T2
TCGA-G3-A25X	1779	0	73	male	M0	N0	Stage II	T2
TCGA-DD-AACJ	2102	0	75	male	M0	N0	Stage II	T2
TCGA-DD-AAVU	2202	0	46	male	M0	N0	Stage II	T2
TCGA-DD-A1EA	2415	0	68	male	M0	N0	Stage II	T2
TCGA-DD-A113	2425	0	55	female	M0	N0	Stage II	T2
TCGA-DD-AAVV	2455	0	56	male	M0	N0	Stage II	T2
TCGA-DD-A118	3437	0	77	female	M0	N0	Stage II	T2
TCGA-DD-A3A8	11	1	75	male	M0	N0	Stage II	T2
TCGA-DD-AADM	12	1	58	male	M0	N0	Stage II	T2
TCGA-5R-AAAM	46	1	65	female	M0	N0	Stage II	T2
TCGA-CC-5261	97	1	44	male	M0	N0	Stage II	T2
TCGA-CC-5258	129	1	48	male	M0	N0	Stage II	T2
TCGA-DD-AACH	195	1	69	male	M0	N0	Stage II	T2
TCGA-CC-A8HV	279	1	51	female	M0	N0	Stage II	T2
TCGA-CC-A7IG	299	1	47	male	M0	N0	Stage II	T2
TCGA-DD-A4NQ	373	1	60	male	M0	N0	Stage II	T2
TCGA-DD-A1EL	415	1	23	male	M0	N0	Stage II	T2
TCGA-DD-AACQ	432	1	50	male	M0	N0	Stage II	T2
TCGA-DD-AACG	469	1	52	male	M0	N0	Stage II	T2
TCGA-G3-A5SI	768	1	44	male	M0	N0	Stage II	T2
TCGA-FV-A23B	1852	1	70	female	M0	N0	Stage II	T2
TCGA-DD-A3A6	3258	1	72	female	M0	N0	Stage II	T2
TCGA-FV-A3I1	247	1	81	female	MX	N0	Stage II	T2
TCGA-FV-A495	1	0	51	female	M0	NX	Stage II	T2
TCGA-ED-A7PZ	6	0	61	male	M0	NX	Stage II	T2
TCGA-ED-A7PX	6	0	48	female	M0	NX	Stage II	T2
TCGA-RC-A6M6	9	0	75	male	M0	NX	Stage II	T2
TCGA-LG-A6GG	387	0	79	female	M0	NX	Stage II	T2
TCGA-ED-A7PY	390	0	20	female	M0	NX	Stage II	T2
TCGA-WQ-AB4B	395	0	62	male	M0	NX	Stage II	T2
TCGA-BC-A69H	444	0	64	male	M0	NX	Stage II	T2
TCGA-G3-A5SM	520	0	58	male	M0	NX	Stage II	T2
TCGA-G3-A5SL	621	0	70	male	M0	NX	Stage II	T2
TCGA-DD-A4NI	816	0	67	male	M0	NX	Stage II	T2
TCGA-FV-A3I0	848	0	76	female	M0	NX	Stage II	T2
TCGA-DD-A39Z	601	1	43	female	M0	NX	Stage II	T2
TCGA-DD-A39V	643	1	77	male	M0	NX	Stage II	T2
TCGA-BC-A217	1397	1	75	female	M0	NX	Stage II	T2
TCGA-QA-A7B7	94	0	48	male	MX	NX	Stage II	T2
TCGA-UB-AA0U	327	0	60	male	MX	NX	Stage II	T2
TCGA-ZS-A9CG	341	0	55	male	MX	NX	Stage II	T2
TCGA-UB-A7MB	601	0	24	male	MX	NX	Stage II	T2
TCGA-DD-A73D	693	0	68	female	MX	NX	Stage II	T2
TCGA-WX-AA46	756	0	61	male	MX	NX	Stage II	T2
TCGA-BD-A3ER	1115	0	62	male	MX	NX	Stage II	T2
TCGA-ZS-A9CE	1241	0	79	female	MX	NX	Stage II	T2
TCGA-2Y-A9H3	1516	0	45	male	MX	NX	Stage II	T2
TCGA-ZS-A9CF	2412	0	64	male	MX	NX	Stage II	T2
TCGA-GJ-A6C0	31	1	75	female	MX	NX	Stage II	T2
TCGA-2Y-A9HA	36	1	70	male	MX	NX	Stage II	T2
TCGA-4R-AA8I	262	1	66	male	MX	NX	Stage II	T2
TCGA-2Y-A9GY	757	1	64	female	MX	NX	Stage II	T2
TCGA-2Y-A9GZ	848	1	82	female	MX	NX	Stage II	T2
TCGA-ZS-A9CD	1386	1	73	male	MX	NX	Stage II	T2
TCGA-DD-A4NA	1008	0	67	female	M0	N1	Stage III	T2
TCGA-K7-AAU7	359	0	61	male	MX	NX	Stage II	T2
TCGA-UB-A7MA	848	0	62	female	M0	N0	Stage II	T2
TCGA-DD-A1EH	1495	0	23	male	M0	N0	Stage III	T3
TCGA-DD-A39W	827	1	29	female	M0	N0	Stage III	T3
TCGA-DD-A3A5	3125	1	66	female	M0	N0	Stage III	T3
TCGA-CC-A123	219	0	24	female	M0	N0	Stage III	T3
TCGA-CC-A9FW	248	0	68	male	M0	N0	Stage III	T3
TCGA-CC-A3MC	363	0	54	male	M0	N0	Stage III	T3
TCGA-CC-A7IH	365	0	58	male	M0	N0	Stage III	T3
TCGA-CC-A7II	399	0	54	male	M0	N0	Stage III	T3
TCGA-G3-A25T	1553	0	45	female	M0	N0	Stage III	T3
TCGA-DD-AAVY	1970	0	56	male	M0	N0	Stage III	T3
TCGA-DD-AAW1	1989	0	55	male	M0	N0	Stage III	T3
TCGA-DD-A4NV	2398	0	61	male	M0	N0	Stage III	T3
TCGA-2Y-A9H0	3675	0	49	male	M0	N0	Stage III	T3
TCGA-CC-A1HT	101	1	50	male	M0	N0	Stage III	T3
TCGA-CC-5264	102	1	71	male	M0	N0	Stage III	T3
TCGA-CC-5263	129	1	35	male	M0	N0	Stage III	T3
TCGA-CC-A8HT	140	1	74	male	M0	N0	Stage III	T3
TCGA-CC-A7IE	217	1	57	male	M0	N0	Stage III	T3
TCGA-CC-A7IK	262	1	59	male	M0	N0	Stage III	T3
TCGA-CC-A7IL	278	1	61	male	M0	N0	Stage III	T3
TCGA-CC-A3M9	300	1	45	male	M0	N0	Stage III	T3
TCGA-CC-A3MA	303	1	61	male	M0	N0	Stage III	T3
TCGA-CC-A5UD	304	1	45	male	M0	N0	Stage III	T3
TCGA-CC-A3MB	315	1	36	male	M0	N0	Stage III	T3
TCGA-CC-A8HU	344	1	39	female	M0	N0	Stage III	T3
TCGA-CC-A5UC	347	1	63	male	M0	N0	Stage III	T3
TCGA-DD-A1EE	349	1	73	male	M0	N0	Stage III	T3
TCGA-DD-A3A4	612	1	37	male	M0	N0	Stage III	T3
TCGA-CC-A7IF	649	1	59	male	M0	N0	Stage III	T3
TCGA-DD-A4NK	1210	1	80	female	M0	N0	Stage III	T3
TCGA-BC-4072	1490	1	74	female	M0	N0	Stage III	T3
TCGA-DD-A116	1622	1	68	male	M0	N0	Stage III	T3
TCGA-DD-A115	2542	1	53	male	M0	N0	Stage III	T3
TCGA-BC-4073	849	0	73	male	MX	N0	Stage III	T3
TCGA-XR-A8TE	925	0	16	male	MX	N0	Stage III	T3
TCGA-BC-A216	1351	0	62	female	M0	NX	Stage III	T3
TCGA-FV-A4ZP	2486	1	78	male	M0	NX	Stage III	T3
TCGA-RC-A6M4	22	0	74	female	MX	NX	Stage III	T3
TCGA-NI-A4U2	1791	1	71	male	MX	NX	Stage III	T3
TCGA-XR-A8TD	1030	0	49	female	M0	N0	Stage III	T3
TCGA-CC-A8HS	300	1	18	male	M0	N1	Stage III	T3
TCGA-ED-A97K	6	0	54	male	M0	N0	Stage III	T3
TCGA-LG-A9QD	366	0	68	male	M0	N0	Stage III	T3
TCGA-ED-A66X	406	0	35	male	M0	N0	Stage III	T3
TCGA-ED-A8O5	406	0	59	female	M0	N0	Stage III	T3
TCGA-ED-A82E	408	0	60	female	M0	N0	Stage III	T3
TCGA-ED-A7XO	427	0	29	male	M0	N0	Stage III	T3
TCGA-5R-AA1D	449	0	17	female	M0	N0	Stage III	T3
TCGA-DD-AAE0	555	0	45	female	M0	N0	Stage III	T3
TCGA-DD-AAD6	672	0	66	male	M0	N0	Stage III	T3
TCGA-DD-A73C	701	0	65	female	M0	N0	Stage III	T3
TCGA-G3-A3CH	780	0	53	male	M0	N0	Stage III	T3
TCGA-DD-AADG	1145	0	70	male	M0	N0	Stage III	T3
TCGA-ED-A8O6	56	1	50	female	M0	N0	Stage III	T3
TCGA-G3-AAV6	65	1	53	female	M0	N0	Stage III	T3
TCGA-ED-A66Y	296	1	51	female	M0	N0	Stage III	T3
TCGA-DD-A4NE	660	1	75	female	M0	N0	Stage III	T3
TCGA-UB-A7MC	500	0	59	male	MX	N0	Stage III	T3
TCGA-YA-A8S7	412	1	68	male	MX	N0	Stage III	T3
TCGA-BC-A10X	770	1	52	female	MX	N0	Stage III	T3
TCGA-BC-A5W4	547	1	69	male	M0	NX	Stage III	T3
TCGA-DD-A4NG	802	1	77	male	M0	NX	Stage III	T3
TCGA-BW-A5NO	20	0	50	male	MX	NX	Stage III	T3
TCGA-EP-A3RK	363	0	73	male	MX	NX	Stage III	T3
TCGA-UB-A7MF	214	1	56	male	MX	NX	Stage III	T3
TCGA-WX-AA47	556	1	33	female	MX	NX	Stage III	T3
TCGA-EP-A2KA	627	1	52	female	MX	NX	Stage III	T3
TCGA-DD-A119	223	1	40	male	M1	N0	Stage IV	T3
TCGA-DD-A3A1	233	1	65	male	M0	N0	Stage III	T3
TCGA-G3-A6UC	671	0	65	male	M0	N0	Stage III	T3
TCGA-DD-A4NH	917	0	65	female	M0	N0	Stage III	T3
TCGA-G3-A25W	935	0	79	female	M0	N0	Stage III	T3
TCGA-DD-A3A7	419	1	67	male	M0	N0	Stage III	T3
TCGA-3K-AAZ8	396	0	65	male	MX	NX	Stage III	T3
TCGA-G3-A7M9	56	1	70	male	MX	NX	Stage III	T3
TCGA-CC-A5UE	272	1	48	male	M0	N0	Stage III	T4
TCGA-PD-A5DF	639	1	58	female	M0	N0	Stage III	T4
TCGA-CC-5259	250	0	60	female	M0	N0	Stage III	T4
TCGA-MI-A75E	507	0	61	male	M0	N0	Stage III	T4
TCGA-BC-A8YO	562	0	66	female	M0	N0	Stage III	T4
TCGA-CC-5260	87	1	61	female	M0	N0	Stage III	T4
TCGA-CC-5262	103	1	67	male	M0	N0	Stage III	T4
TCGA-G3-AAV1	359	1	51	male	M0	N0	Stage III	T4
TCGA-DD-A1EK	558	1	64	female	M1	N0	Stage IV	T4
TCGA-DD-A3A9	931	1	64	female	M1	N0	Stage IV	T4
