# Supplementary material for: An Autophagy-Related Gene-Based Prognostic Risk Signature for Hepatocellular Carcinoma: Construction and Validation
Source: Comput Math Methods Med. 2021 Oct 13;2021:5770228. doi: 10.1155/2021/5770228 (PMC8529386; doi:10.1155/2021/5770228)
Supplement: Supplementary 3 — Supplementary Table 3: LIRI-JP in the ICGC database used in this study. [file 5770228.f3.txt]

id	futime	fustat
SP99275-DO45275	10	1
SP50113-DO23516	20	1
SP112178-DO50798	30	1
SP99011-DO45145	60	1
SP99133-DO45205	90	1
SP112152-DO50785	90	1
SP112248-DO50832	90	0
SP99109-DO45193	120	1
SP107012-DO48682	120	1
SP50183-DO23551	150	1
SP107094-DO48728	150	0
SP112213-DO50815	150	0
SP50103-DO23511	180	1
SP50141-DO23530	180	1
SP107073-DO48717	180	1
SP192726-DO50859	180	0
SP112310-DO50859	180	0
SP99217-DO45247	210	0
SP112276-DO50845	210	0
SP112304-DO50857	210	0
SP99145-DO45211	240	0
SP99213-DO45245	240	1
SP99341-DO45307	240	1
SP107119-DO48741	240	0
SP99157-DO45217	270	1
SP99249-DO45263	270	1
SP99337-DO45305	300	0
SP112273-DO50844	300	0
SP99241-DO45259	330	0
SP112261-DO50839	330	0
SP112265-DO50840	330	0
SP98981-DO45131	360	1
SP99305-DO45289	360	0
SP50097-DO23508	390	0
SP99113-DO45195	390	0
SP99165-DO45221	390	1
SP99301-DO45287	390	0
SP107091-DO48727	390	1
SP112215-DO50816	390	0
SP112217-DO50817	390	0
SP112234-DO50825	390	0
SP98973-DO45127	420	1
SP112208-DO50813	420	0
SP192714-DO50814	420	0
SP112211-DO50814	420	0
SP112210-DO50814	420	0
SP50157-DO23538	450	0
SP98925-DO45103	450	0
SP106993-DO48672	450	0
SP112205-DO50811	450	0
SP99271-DO45273	480	0
SP99269-DO45273	480	0
SP99297-DO45285	480	0
SP107136-DO48751	480	1
SP107146-DO48757	480	0
SP112147-DO50783	480	0
SP112156-DO50787	480	0
SP112165-DO50791	480	1
SP98955-DO45119	510	1
SP99293-DO45283	510	0
SP112182-DO50800	510	0
SP112219-DO50818	510	0
SP112221-DO50819	510	0
SP112224-DO50820	510	0
SP112228-DO50822	510	0
SP99045-DO45161	540	1
SP107132-DO48747	540	0
SP112170-DO50793	540	0
SP112168-DO50793	540	0
SP112180-DO50799	540	0
SP112188-DO50803	540	0
SP112194-DO50806	540	0
SP112196-DO50807	540	0
SP50171-DO23545	570	1
SP98965-DO45123	570	1
SP99089-DO45183	570	1
SP99257-DO45267	570	1
SP107078-DO48720	570	0
SP107123-DO48743	570	0
SP107129-DO48746	570	0
SP112160-DO50789	570	0
SP112198-DO50808	570	0
SP112241-DO50829	570	0
SP112300-DO50855	570	0
SP99065-DO45171	600	0
SP99081-DO45179	600	0
SP99093-DO45185	600	0
SP99279-DO45277	600	0
SP107084-DO48723	600	0
SP107104-DO48733	600	0
SP107109-DO48736	600	0
SP107121-DO48742	600	0
SP50119-DO23519	630	0
SP99221-DO45249	630	0
SP107097-DO48730	630	0
SP107101-DO48732	630	0
SP112138-DO50778	630	0
SP192707-DO227801	660	0
SP98985-DO45133	660	1
SP99053-DO45165	690	0
SP107068-DO48715	690	1
SP107076-DO48719	690	0
SP107152-DO48760	690	0
SP112133-DO50776	690	0
SP112192-DO50805	690	0
SP98900-DO45093	720	1
SP192387-DO45147	720	1
SP99233-DO45255	720	0
SP107037-DO48695	720	0
SP107071-DO48716	720	0
SP107111-DO48737	720	0
SP107150-DO48759	720	0
SP112130-DO50774	720	0
SP112190-DO50804	720	0
SP112201-DO50809	720	1
SP112288-DO50850	720	0
SP50161-DO23540	750	0
SP99261-DO45269	750	0
SP99287-DO45281	750	0
SP99289-DO45281	750	0
SP107052-DO48704	750	0
SP50099-DO23509	780	1
SP107047-DO48701	780	0
SP107088-DO48725	780	0
SP50185-DO23552	810	0
SP99237-DO45257	810	0
SP107041-DO48697	810	1
SP107044-DO48700	810	0
SP107063-DO48712	810	0
SP50149-DO23534	840	0
SP50177-DO23548	840	0
SP98949-DO45115	840	0
SP50101-DO23510	870	0
SP99201-DO45239	870	0
SP99229-DO45253	870	0
SP107056-DO48706	870	0
SP107155-DO48761	870	0
SP50143-DO23531	900	0
SP50147-DO23533	900	0
SP50155-DO23537	900	1
SP99125-DO45201	900	0
SP99189-DO45233	900	0
SP99193-DO45235	900	0
SP99197-DO45237	900	0
SP99225-DO45251	900	0
SP107010-DO48681	900	0
SP107032-DO48693	900	0
SP107080-DO48721	900	0
SP50139-DO23529	930	0
SP50153-DO23536	930	0
SP50163-DO23541	930	0
SP99185-DO45231	930	0
SP99209-DO45243	930	0
SP112186-DO50802	930	0
SP50145-DO23532	960	0
SP50151-DO23535	960	0
SP50165-DO23542	960	0
SP50169-DO23544	960	0
SP99049-DO45163	960	0
SP50179-DO23549	990	0
SP50181-DO23550	990	0
SP99181-DO45229	990	0
SP99245-DO45261	990	0
SP99333-DO45303	990	0
SP50137-DO23528	1020	0
SP50167-DO23543	1020	0
SP50175-DO23547	1020	0
SP99169-DO45223	1020	0
SP99177-DO45227	1020	0
SP99253-DO45265	1020	0
SP50129-DO23524	1050	0
SP50131-DO23525	1050	0
SP50133-DO23526	1050	0
SP50135-DO23527	1050	0
SP50173-DO23546	1050	0
SP99137-DO45207	1050	0
SP99173-DO45225	1050	0
SP50127-DO23523	1080	0
SP99161-DO45219	1080	0
SP99205-DO45241	1080	0
SP50123-DO23521	1110	0
SP50159-DO23539	1110	0
SP98953-DO45117	1110	1
SP99073-DO45175	1140	0
SP107004-DO48677	1140	0
SP192418-DO45173	1170	0
SP99069-DO45173	1170	0
SP99117-DO45197	1170	0
SP99129-DO45203	1170	0
SP99153-DO45215	1170	0
SP50107-DO23513	1200	0
SP50115-DO23517	1200	0
SP98898-DO45092	1200	1
SP99085-DO45181	1200	0
SP99101-DO45189	1200	0
SP99105-DO45191	1200	0
SP99149-DO45213	1200	0
SP107007-DO48679	1200	0
SP50111-DO23515	1230	0
SP191990-DO227643	1260	0
SP50105-DO23512	1260	0
SP99019-DO45149	1260	0
SP99077-DO45177	1260	0
SP99097-DO45187	1260	0
SP99321-DO45297	1260	1
SP106998-DO48674	1260	0
SP50109-DO23514	1290	0
SP98907-DO45096	1290	1
SP98909-DO45096	1290	1
SP99007-DO45143	1290	0
SP99283-DO45279	1290	0
SP50117-DO23518	1320	0
SP98896-DO45091	1320	1
SP98991-DO45137	1320	0
SP99265-DO45139	1320	0
SP98997-DO45139	1320	0
SP112184-DO45139	1320	0
SP99001-DO45141	1320	0
SP99003-DO45141	1320	0
SP99061-DO45169	1350	0
SP99121-DO45199	1350	0
SP99141-DO45209	1350	0
SP99029-DO45153	1380	0
SP98989-DO45135	1410	0
SP99057-DO45167	1440	1
SP99325-DO45299	1440	0
SP99329-DO45301	1440	1
SP98975-DO45129	1470	0
SP99041-DO45159	1470	0
SP98959-DO45121	1530	0
SP98945-DO45113	1560	0
SP98915-DO45099	1590	0
SP98937-DO45109	1590	0
SP98941-DO45111	1590	0
SP98904-DO45095	1620	0
SP98913-DO45097	1620	0
SP98902-DO45094	1650	0
SP98921-DO45101	1680	0
SP98927-DO45105	1680	0
SP98967-DO45125	1680	0
SP98933-DO45107	1710	0
SP99037-DO45157	1980	0
SP99033-DO45155	2160	0
